# Supplementary material for: Conformal prediction under feedback covariate shift for biomolecular design
Source: PubMed Central journal article supplement — Proc Natl Acad Sci U S A. 2022 Oct 18;119(43):e2204569119. doi: 10.1073/pnas.2204569119 (PMC9618043; doi:10.1073/pnas.2204569119), 2022-10-18
Supplement: pnas.2204569119.sapp.pdf [file pnas.2204569119.sapp.pdf]

1

## 2 **Supplementary Information for**

### 3 **Conformal Prediction for Biological Design**

4 **Clara Fannjiang, Stephen Bates, Anastasios N. Angelopoulos, Jennifer Listgarten, and Michael I. Jordan**

5 **Clara Fannjiang and Michael I. Jordan.**

6 **E-mails: [clarafy@berkeley.edu](mailto:clarafy@berkeley.edu), [jordan@cs.berkeley.com](mailto:jordan@cs.berkeley.com)**

#### 7 **This PDF file includes:**

- 8     Supplementary text
- 9     Figs. S1 to S6 (not allowed for Brief Reports)
- 10    SI References

## 11 Supporting Information Text

### 12 S1. Proofs

13 **A. Proof of Theorem 1.** Data from feedback covariate shift (FCS) are a special case of what we call *pseudo-exchangeable*\*  
14 random variables.

**Definition S1.** Random variables  $V_1, \dots, V_{n+1}$  are pseudo-exchangeable with factor functions  $g_1, \dots, g_{n+1}$  and core function  $h$  if the density,  $f$ , of their joint distribution can be factorized as

$$f(v_1, \dots, v_{n+1}) = \prod_{i=1}^{n+1} g_i(v_i; v_{-i}) \cdot h(v_1, \dots, v_{n+1}),$$

15 where  $v_{-i} = v_{1:(n+1)} \setminus v_i$ ,<sup>†</sup> each  $g_i(\cdot; v_{-i})$  is a function that depends on the multiset  $v_{-i}$  (that is, on the values in  $v_{-i}$  but not  
16 on their ordering), and  $h$  is a function that does not depend on the ordering of its  $n + 1$  inputs.

17 The following lemma characterizes the distribution of the scores of pseudo-exchangeable random variables, which allows for  
18 a pseudo-exchangeable generalization of conformal prediction in Theorem S1. We then show that data generated under FCS  
19 are pseudo-exchangeable, and a straightforward application of Theorem S1 yields Theorem 1 as a corollary. Our technical  
20 development here builds upon the work of Tibshirani et al. (1), who generalized conformal prediction to handle “weighted  
21 exchangeable” random variables, including data under standard covariate shift.

22 The key insight is that if we condition on the values, but not the ordering, of the scores, we can exactly describe their  
23 distribution. The following proposition is a generalization of arguments found in the proof of Lemma 3 in (1); the subsequent  
24 result in Lemma 1 is a generalization of that lemma.

**Proposition 1.** Let  $Z_1, \dots, Z_{n+1}$  be pseudo-exchangeable random variables with a joint density function,  $f$ , that can be  
written with factor functions  $g_1, \dots, g_{n+1}$  and core function  $h$ . Let  $S$  be any score function and denote  $S_i = S(Z_i, Z_{-i})$  where  
 $Z_{-i} = Z_{1:(n+1)} \setminus \{Z_i\}$  for  $i = 1, \dots, n + 1$ . Define

$$w_i(z_1, \dots, z_{n+1}) \equiv \frac{\sum_{\sigma: \sigma(n+1)=i} \prod_{j=1}^{n+1} g_j(z_{\sigma(j)}; z_{-\sigma(j)})}{\sum_{\sigma} \prod_{j=1}^{n+1} g_j(z_{\sigma(j)}; z_{-\sigma(j)}), \quad i = 1, \dots, n + 1, \quad [S1]$$

where the summations are taken over permutations,  $\sigma$ , of the integers  $1, \dots, n + 1$ . For values  $z = (z_1, \dots, z_{n+1})$ , let  
 $s_i = S(z_i, z_{-i})$  and let  $E_z$  be the event that  $\{Z_1, \dots, Z_{n+1}\} = \{z_1, \dots, z_{n+1}\}$  (that is, the multiset of values taken on by  
 $Z_1, \dots, Z_{n+1}$  equals the multiset of the values in  $z$ ). Then

$$S_{n+1} | E_z \sim \sum_{i=1}^{n+1} w_i(z_1, \dots, z_{n+1}) \delta_{s_i}.$$

*Proof.* For simplicity, we treat the case where  $S_1, \dots, S_{n+1}$  are distinct almost surely; the result also holds in the general case,  
but the notation that accommodates duplicate values is cumbersome. For  $i = 1, \dots, n + 1$ ,

$$\begin{aligned} \mathbb{P}(S_{n+1} = s_i | E_z) &= \mathbb{P}(Z_{n+1} = z_i | E_z) = \frac{\sum_{\sigma: \sigma(n+1)=i} f(z_{\sigma(1)}, \dots, z_{\sigma(n+1)})}{\sum_{\sigma} f(z_{\sigma(1)}, \dots, z_{\sigma(n+1)})} \\ &= \frac{\sum_{\sigma: \sigma(n+1)=i} \prod_{j=1}^{n+1} g_j(z_{\sigma(j)}; z_{-\sigma(j)}) \cdot h(z_{\sigma(1)}, \dots, z_{\sigma(n+1)})}{\sum_{\sigma} \prod_{j=1}^{n+1} g_j(z_{\sigma(j)}; z_{-\sigma(j)}) \cdot h(z_{\sigma(1)}, \dots, z_{\sigma(n+1)})} \\ &= \frac{\sum_{\sigma: \sigma(n+1)=i} \prod_{j=1}^{n+1} g_j(z_{\sigma(j)}; z_{-\sigma(j)}) \cdot h(z_1, \dots, z_{n+1})}{\sum_{\sigma} \prod_{j=1}^{n+1} g_j(z_{\sigma(j)}; z_{-\sigma(j)}) \cdot h(z_1, \dots, z_{n+1})} \\ &= \frac{\sum_{\sigma: \sigma(n+1)=i} \prod_{j=1}^{n+1} g_j(z_{\sigma(j)}; z_{-\sigma(j)})}{\sum_{\sigma} \prod_{j=1}^{n+1} g_j(z_{\sigma(j)}; z_{-\sigma(j)})} \\ &= w_i(z_1, \dots, z_{n+1}). \end{aligned}$$

25

□

\*The name *pseudo-exchangeable* hearkens to the similarity of the factorized form to the pseudo-likelihood approximation of a joint density. Note, however, that each factor,  $g_i(v_i; v_{-i})$ , can only depend on the values and not the ordering of the other variables,  $v_1, \dots, v_{i-1}, v_{i+1}, \dots, v_n$ , whereas each factor in the pseudo-likelihood approximation also depends on the identities (i.e., the ordering) of the other variables.

<sup>†</sup>With some abuse of notation, we denote  $z_{-i} = z_{1:(n+1)} \setminus z_i$  whenever possible, as done here, but use  $z_{-i} = z_{1:n} \setminus z_i$  whenever we need to append a candidate test point, as done in the main text and in Theorem S1 below. In either case, we will clarify.

**Lemma 1.** Let  $Z_1, \dots, Z_{n+1}$  be pseudo-exchangeable random variables with a joint density function,  $f$ , that can be written with factor functions  $g_1, \dots, g_{n+1}$  and core function  $h$ . Let  $S$  be any score function and denote  $S_i = S(Z_i, Z_{-i})$  where  $Z_{-i} = Z_{1:(n+1)} \setminus \{Z_i\}$  for  $i = 1, \dots, n+1$ . For any  $\beta \in (0, 1)$ ,

$$\mathbb{P} \left\{ S_{n+1} \leq \text{QUANTILE}_\beta \left( \sum_{i=1}^{n+1} w_i(Z_1, \dots, Z_{n+1}) \delta_{S_i} \right) \right\} \geq \beta,$$

where  $w_i(z_1, \dots, z_{n+1})$  is defined in Eq. [S1].

*Proof.* Assume for simplicity of notation that  $S_1, \dots, S_{n+1}$  are distinct almost surely (but the result holds generally). For data point values  $z = (z_1, \dots, z_{n+1})$ , let  $s_i = S(z_i, z_{-i})$  and let  $E_z$  be the event that  $\{Z_1, \dots, Z_{n+1}\} = \{z_1, \dots, z_{n+1}\}$ . By Proposition 1,

$$S_{n+1} | E_z \sim \sum_{i=1}^{n+1} w_i(z_1, \dots, z_{n+1}) \delta_{s_i},$$

and consequently

$$\mathbb{P} \left( S_{n+1} \leq \text{QUANTILE}_\beta \left( \sum_{i=1}^{n+1} w_i(z_1, \dots, z_{n+1}) \delta_{s_i} \right) \middle| E_z \right) \geq \beta,$$

by definition of the  $\beta$ -quantile; equivalently, since we condition on  $E_z$ ,

$$\mathbb{P} \left( S_{n+1} \leq \text{QUANTILE}_\beta \left( \sum_{i=1}^{n+1} w_i(Z_1, \dots, Z_{n+1}) \delta_{S_i} \right) \middle| E_z \right) \geq \beta.$$

Since this inequality holds for all events  $E_z$ , where  $z$  is a vector of  $n+1$  data point values, smoothing gives

$$\mathbb{P} \left( S_{n+1} \leq \text{QUANTILE}_\beta \left( \sum_{i=1}^{n+1} w_i(Z_1, \dots, Z_{n+1}) \delta_{S_i} \right) \right) \geq \beta.$$

27

□

Lemma 1 yields the following theorem, which enables a generalization of conformal prediction to pseudo-exchangeable random variables.

**Theorem S1.** Suppose  $Z_1, \dots, Z_{n+1}$  where  $Z_i = (X_i, Y_i) \in \mathcal{X} \times \mathbb{R}$  are pseudo-exchangeable random variables with factor functions  $g_1, \dots, g_{n+1}$ . For any score function,  $S$ , and any miscoverage level,  $\alpha \in (0, 1)$ , define for any point  $x \in \mathcal{X}$ :

$$C_\alpha(x) = \left\{ y \in \mathbb{R} : S_{n+1}(x, y) \leq \text{QUANTILE}_{1-\alpha} \left( \sum_{i=1}^{n+1} w_i(Z_1, \dots, Z_n, (x, y)) \delta_{S_i(x, y)} \right) \right\}, \quad [\text{S2}]$$

where  $S_i(x, y) = S(Z_i, Z_{-i} \cup \{(x, y)\})$  and  $Z_{-i} = Z_{1:n} \setminus Z_i$  for  $i = 1, \dots, n$ ,  $S_{n+1}(x, y) = S((x, y), Z_{1:n})$ , and the weight functions  $w_i$  are as defined in Eq. [S1]. Then  $C_\alpha$  satisfies

$$\mathbb{P}(Y_{n+1} \in C_\alpha(X_{n+1})) \geq 1 - \alpha,$$

where the probability is over all  $n+1$  data points,  $Z_1, \dots, Z_{n+1}$ .

*Proof.* By construction, we have

$$Y_{n+1} \in C_\alpha(X_{n+1}) \iff S_{n+1}(X_{n+1}, Y_{n+1}) \leq \text{QUANTILE}_{1-\alpha} \left( \sum_{i=1}^{n+1} w_i(Z_1, \dots, Z_{n+1}) \delta_{S_i(X_{n+1}, Y_{n+1})} \right).$$

Applying Lemma 1 gives the result. □

Finally, Theorem 1 follows as a corollary of Theorem S1. Denoting  $Z_{n+1} = Z_{\text{test}}$  and  $Z_{-i} = Z_{1:(n+1)} \setminus \{Z_i\}$ , observe that data,  $(Z_1, \dots, Z_{n+1})$ , under FCS are pseudo-exchangeable with the core function

$$h(z_1, \dots, z_{n+1}) = \prod_{i=1}^{n+1} p_X(x_i) p_{Y|X}(y_i | x_i),$$

and factor functions  $g_i(z_i; z_{-i}) = 1$  for  $i = 1, \dots, n$  and

$$g_{n+1}(z_{n+1}; z_{1:n}) = \frac{\tilde{p}_{X; z_{1:n}}(x_{n+1}) p_{Y|X}(y_{n+1} | x_{n+1})}{p_X(x_{n+1}) p_{Y|X}(y_{n+1} | x_{n+1})} = \frac{\tilde{p}_{X; z_{1:n}}(x_{n+1})}{p_X(x_{n+1})} = v(x_{n+1}; z_{1:n})$$

where  $v(\cdot; \cdot)$  is the likelihood ratio function defined in Eq. [2]. The weights,  $w_i(z_1, \dots, z_{n+1})$ , in Eq. [S1] then simplify as

$$\begin{aligned} w_i(z_1, \dots, z_{n+1}) &= \frac{\sum_{\sigma: \sigma(n+1)=i} \prod_{j=1}^{n+1} g_j(z_{\sigma(j)}; z_{-\sigma(j)})}{\sum_{\sigma} \prod_{j=1}^{n+1} g_j(z_{\sigma(j)}; z_{-\sigma(j)})} = \frac{\sum_{\sigma: \sigma(n+1)=i} \prod_{j=1}^{n+1} g_j(z_{\sigma(j)}; z_{-\sigma(j)})}{\sum_{k=1}^{n+1} \sum_{\sigma: \sigma(n+1)=k} \prod_{j=1}^{n+1} g_j(z_{\sigma(j)}; z_{-\sigma(j)})} \\ &= \frac{\sum_{\sigma: \sigma(n+1)=i} g_{n+1}(z_{\sigma(n+1)}; z_{-\sigma(n+1)})}{\sum_{k=1}^{n+1} \sum_{\sigma: \sigma(n+1)=k} g_{n+1}(z_{\sigma(n+1)}; z_{-\sigma(n+1)})} \\ &= \frac{\sum_{\sigma: \sigma(n+1)=i} g_{n+1}(z_i; z_{-i})}{\sum_{k=1}^{n+1} \sum_{\sigma: \sigma(n+1)=k} g_{n+1}(z_k; z_{-k})} \\ &= \frac{n! \cdot g_{n+1}(z_i; z_{-i})}{\sum_{k=1}^{n+1} n! \cdot g_{n+1}(z_k; z_{-k})} \\ &= \frac{v(x_i; z_{-i})}{\sum_{k=1}^{n+1} v(x_k; z_{-k})}. \end{aligned}$$

32 These quantities are exactly the weight functions,  $w_i^y$ , defined in Eq. [4] and used in the full conformal confidence set in Eq. [3]:  
 33  $w_i^y(X_{\text{test}}) = w_i(Z_1, \dots, Z_n, (X_{\text{test}}, y))$  for  $i = 1, \dots, n+1$ . That is, Eq. [3] gives the confidence set defined in Eq. [S2] for data  
 34 under FCS. Applying Theorem S1 then yields Theorem 1.

**B. A randomized confidence set achieves exact coverage.** Here, we introduce the *randomized  $\beta$ -quantile* and a corresponding randomized confidence set that achieves exact coverage. To lighten notation, for a discrete distribution with probability masses  $w = (w_1, \dots, w_{n+1})$  on points  $s = (s_1, \dots, s_{n+1})$ , where  $s_i \in \mathbb{R}$  and  $w_i \geq 0$ ,  $\sum_{i=1}^{n+1} w_i = 1$ , we will write  $\text{QUANTILE}_{\beta}(s, w) = \text{QUANTILE}_{\beta}(\sum_{i=1}^n w_i \delta_{s_i})$ . Observe that  $\text{QUANTILE}_{\beta}(s, w)$  is always one of the support points,  $s_i$ . Now define the  *$\beta$ -quantile lower bound*:

$$\text{QUANTILELB}_{\beta}(s, w) = \inf \left\{ s : \sum_{i: s_i \leq s} w_i < \beta, \sum_{i: s_i \leq s} w_i + \sum_{j: s_j = \text{QUANTILE}_{\beta}(s, w)} w_j \geq \beta \right\},$$

which is either a support point strictly less than the  $\beta$ -quantile, or negative infinity. Finally, letting  $\text{QF}_{\beta}(s, w)$  and  $\text{LF}_{\beta}(s, w)$  denote the CDF of the discrete distribution at  $\text{QUANTILE}_{\beta}(s, w)$  and  $\text{QUANTILELB}_{\beta}(s, w)$ , respectively, the randomized  $\beta$ -quantile is a random variable that takes on the value of either the  $\beta$ -quantile or the  $\beta$ -quantile lower bound:

$$\text{RANDOMIZEDQUANTILE}_{\beta}(s, w) = \begin{cases} \text{QUANTILELB}_{\beta}(s, w) & \text{w. p. } \frac{\text{QF}_{\beta}(s, w) - \beta}{\text{QF}_{\beta}(s, w) - \text{LF}_{\beta}(s, w)}, \\ \text{QUANTILE}_{\beta}(s, w) & \text{w. p. } 1 - \frac{\text{QF}_{\beta}(s, w) - \beta}{\text{QF}_{\beta}(s, w) - \text{LF}_{\beta}(s, w)}. \end{cases} \quad [\text{S3}]$$

We use this quantity to define the *randomized full conformal confidence set*, which, for any miscoverage level,  $\alpha \in (0, 1)$ , and  $x \in \mathcal{X}$  is the following random variable:

$$C_{\alpha}^{\text{rand}}(x) = \{y \in \mathbb{R} : S((x, y), Z_{1:n}) \leq \text{RANDOMIZEDQUANTILE}_{1-\alpha}(s(Z_1, \dots, Z_n, (x, y)), w(Z_1, \dots, Z_n, (x, y)))\}, \quad [\text{S4}]$$

35 where  $s(Z_1, \dots, Z_n, (x, y)) = (S_1, \dots, S_n, S((x, y), Z_{1:n}))$  and  $S_i = S(Z_i, Z_{-i} \cup \{(x, y)\})$  for  $i = 1, \dots, n$ , and  
 36  $w(Z_1, \dots, Z_n, (x, y)) = (w_1^y(x), \dots, w_{n+1}^y(x))$  where  $w_i^y(x)$  is defined in Eq. [4]. Note that for each candidate label,  $y \in \mathbb{R}$ , an  
 37 independent randomized  $\beta$ -quantile is instantiated; some values will use the  $\beta$ -quantile as the threshold on the score, while the  
 38 others will use the  $\beta$ -quantile lower bound. Randomizing the confidence set in this way yields the following result.

**Theorem S2.** *Suppose data,  $Z_1, \dots, Z_n, Z_{\text{test}}$ , are generated under feedback covariate shift and assume  $\tilde{P}_{X; D}$  is absolutely continuous with respect to  $P_X$  for all possible values of  $D$ . Then, for any miscoverage level,  $\alpha \in (0, 1)$ , the randomized full confidence set,  $C_{\alpha}^{\text{rand}}$ , in Eq. [S4] satisfies the exact coverage property:*

$$\mathbb{P}(Y_{\text{test}} \in C_{\alpha}^{\text{rand}}(X_{\text{test}})) = 1 - \alpha, \quad [\text{S5}]$$

39 where the probability is over  $Z_1, \dots, Z_n, Z_{\text{test}}$  and the randomness in  $C_{\alpha}^{\text{rand}}$ .

*Proof.* Denote  $Z_{n+1} = Z_{\text{test}}$  and  $Z = (Z_1, \dots, Z_{n+1})$ . For a vector of  $n + 1$  data point values,  $z = (z_1, \dots, z_{n+1})$ , use the following shorthand:

$$\begin{aligned} Q_\beta(z) &= \text{QUANTILE}_\beta(s(z), w(z)), \\ L_\beta(z) &= \text{QUANTILELB}_\beta(s(z), w(z)), \\ R_\beta(z) &= \text{RANDOMIZEDQUANTILE}_\beta(s(z), w(z)), \\ \text{QF}_\beta(z) &= \text{QF}_\beta(s(z), w(z)), \\ \text{LF}_\beta(z) &= \text{LF}_\beta(s(z), w(z)). \end{aligned}$$

As in the proof of Lemma 1, consider the event,  $E_z$ , that  $\{Z_1, \dots, Z_{n+1}\} = \{z_1, \dots, z_{n+1}\}$ . Assuming for simplicity that the scores are distinct almost surely, by Proposition 1

$$S(Z_{n+1}, Z_{1:n}) \mid E_z \sim \sum_{i=1}^{n+1} w_i(z_1, \dots, z_{n+1}) \delta_{S(z_i, z_{-i})},$$

and consequently

$$\begin{aligned} &\mathbb{P}(S(Z_{n+1}, Z_{1:n}) \leq R_{1-\alpha}(z) \mid E_z) \\ &= \mathbb{P}(S(Z_{n+1}, Z_{1:n}) \leq R_{1-\alpha}(z) \mid E_z, R_{1-\alpha}(z) = Q_{1-\alpha}(z)) \cdot \mathbb{P}(R_{1-\alpha}(z) = Q_{1-\alpha}(z) \mid E_z) + \\ &\quad \mathbb{P}(S(Z_{n+1}, Z_{1:n}) \leq R_{1-\alpha}(z) \mid E_z, R_{1-\alpha}(z) = L_{1-\alpha}(z)) \cdot \mathbb{P}(R_{1-\alpha}(z) = L_{1-\alpha}(z) \mid E_z) \\ &= \mathbb{P}(S(Z_{n+1}, Z_{1:n}) \leq Q_{1-\alpha}(z) \mid E_z) \cdot \left(1 - \frac{\text{QF}_{1-\alpha}(z) - (1-\alpha)}{\text{QF}_{1-\alpha}(z) - \text{LF}_{1-\alpha}(z)}\right) + \\ &\quad \mathbb{P}(S(Z_{n+1}, Z_{1:n}) \leq L_{1-\alpha}(z) \mid E_z) \cdot \frac{\text{QF}_{1-\alpha}(z) - (1-\alpha)}{\text{QF}_{1-\alpha}(z) - \text{LF}_{1-\alpha}(z)} \\ &= \text{QF}_{1-\alpha}(z) \cdot \left(1 - \frac{\text{QF}_{1-\alpha}(z) - (1-\alpha)}{\text{QF}_{1-\alpha}(z) - \text{LF}_{1-\alpha}(z)}\right) + \text{LF}_{1-\alpha}(z) \cdot \frac{\text{QF}_{1-\alpha}(z) - (1-\alpha)}{\text{QF}_{1-\alpha}(z) - \text{LF}_{1-\alpha}(z)} \\ &= -(\text{QF}_{1-\alpha}(z) - \text{LF}_{1-\alpha}(z)) \cdot \frac{\text{QF}_{1-\alpha}(z) - (1-\alpha)}{\text{QF}_{1-\alpha}(z) - \text{LF}_{1-\alpha}(z)} + \text{QF}_{1-\alpha}(z) \\ &= -\text{QF}_{1-\alpha}(z) + (1-\alpha) + \text{QF}_{1-\alpha}(z) \\ &= 1 - \alpha. \end{aligned}$$

Since we condition on  $E_z$ , we equivalently have

$$\mathbb{P}(S(Z_{n+1}, Z_{1:n}) \leq R_{1-\alpha}(Z) \mid E_z) = 1 - \alpha,$$

and since this equality holds for all events  $E_z$ , where  $z$  is a vector of  $n + 1$  data point values, taking an expectation over  $E_z$  yields

$$\mathbb{P}(S(Z_{n+1}, Z_{1:n}) \leq R_{1-\alpha}(Z)) = 1 - \alpha.$$

Finally, since

$$Y_{n+1} \in C_\alpha^{\text{rand}}(X_{n+1}) \iff S(Z_{n+1}, Z_{1:n}) \leq R_{1-\alpha}(Z),$$

40 the result follows. □

41 Note that standard covariate shift is subsumed by feedback covariate shift, so Theorem S2 can be used to construct a  
42 randomized confidence set with exact coverage under standard covariate shift as well.

43 **C. Data splitting.** In general, computing the full conformal confidence set,  $C_\alpha(x)$ , using Alg. 1 requires fitting  $(n + 1) \times |\mathcal{Y}|$   
44 regression models. A much more computationally attractive alternative is called a *data splitting* or *split conformal* approach (2, 3),  
45 in which we (i) randomly partition the labeled data into disjoint training and *calibration* data sets, (ii) fit a regression model to  
46 the training data, and (iii) use the scores that it provides for the calibration data (but not the training data) to construct  
47 confidence sets for test data points. Though this approach only requires fitting a single model, the trade-off is that it does not  
48 use the labeled data as efficiently: only some fraction of our labeled data can be used to train the regression model. This  
49 limitation may be inconsequential for settings with abundant data, but can be a nonstarter when labeled data is limited, such  
50 as in many protein design problems.

51 Here, we show how data splitting simplifies feedback covariate shift (FCS) to standard covariate shift. We then use the data  
52 splitting method from Tibshirani et al. (1) to produce confidence sets with coverage; the subsequent subsection shows how to  
53 introduce randomization to achieve exact coverage.

54 To begin, we recall the standard covariate shift model (4–6). The training data,  $Z_1, \dots, Z_n$  where  $Z_i = (X_i, Y_i)$ , are i.i.d.  
 55 from some distribution:  $X_i \sim P_X, Y_i \sim P_{Y|X_i}$  for  $i = 1, \dots, n$ . A test data point,  $Z_{\text{test}} = (X_{\text{test}}, Y_{\text{test}})$ , is drawn from a different  
 56 input distribution but the same conditional distribution,  $X_{\text{test}} \sim \tilde{P}_X, Y_{\text{test}} \sim P_{Y|X_{\text{test}}}$ , independently from the training data.  
 57 In contrast to FCS, here the test input cannot be chosen in a way that depends on the training data.

58 Returning to FCS, suppose we randomly partition all our labeled data into disjoint training and calibration data sets. Let  $\mu$   
 59 denote the regression model fit to the training data; we henceforth consider  $\mu$  as fixed and make no further use of the training  
 60 data. As such, without loss of generality we will use  $Z_1, \dots, Z_m$  to refer to the calibration data. Now suppose the test input  
 61 distribution is induced by the trained regression model,  $\mu$ ; we write this as  $\tilde{P}_{X;\mu}$ . Observe that, conditioned on the training  
 62 data, we now have a setting where the calibration and test data are drawn from different input distributions but the same  
 63 conditional distribution,  $P_{Y|X}$ , and are independent of each other. That is, data splitting returns us to standard covariate shift.

To construct valid confidence sets under standard covariate shift, define the following likelihood ratio function:

$$v(x) = \frac{\tilde{p}_{X;\mu}(x)}{p_X(x)}, \quad [S6]$$

where  $p_X$  and  $\tilde{p}_{X;\mu}$  refer to the densities of the training and test input distributions, respectively. We restrict our attention to  
 score functions of the following form (7):

$$S(x, y) = \frac{|y - \mu(x)|}{u(x)}. \quad [S7]$$

where  $u$  is any heuristic, nonnegative notion of uncertainty; one can also set  $u(x) = 1$  to recover the residual score function.  
 Note that, since we condition on the training data and treat the regression model as fixed, the score of a point,  $(x, y)$ , is no  
 longer also a function of other data points. Finally, for any miscoverage level,  $\alpha \in (0, 1)$ , and any  $x \in \mathcal{X}$ , define the *split*  
*conformal* confidence set as

$$C_\alpha^{\text{split}}(x) = \mu(x) \pm q \cdot u(x), \quad [S8]$$

$$q = \text{QUANTILE}_{1-\alpha} \left( \sum_{i=1}^m w_i(x) \delta_{S_i} + w_{m+1}(x) \delta_\infty \right),$$

where  $S_i = S(X_i, Y_i)$  for  $i = 1, \dots, m$  and

$$w_i(x) = \frac{v(X_i)}{\sum_{j=1}^m v(X_j) + v(x)}, \quad i = 1, \dots, m, \quad [S9]$$

$$w_{m+1}(x) = \frac{v(x)}{\sum_{j=1}^m v(X_j) + v(x)}.$$

64 For data under standard covariate shift, the split conformal confidence set achieves coverage, as first shown in (1).

65 **Theorem S3** (Corollary 1 in (1)). *Suppose calibration and test data,  $Z_1, \dots, Z_m, Z_{\text{test}}$ , are under standard covariate shift,*  
 66 *and assume  $\tilde{P}_{X;\mu}$  is absolutely continuous with respect to  $P_X$ . For score functions of the form in Eq. [S7], and any miscoverage*  
 67 *level,  $\alpha \in (0, 1)$ , the split conformal confidence set,  $C_\alpha^{\text{split}}(x)$ , in Eq. [S8] satisfies the coverage property in Eq. [1].*

68 To achieve exact coverage, we can introduce randomization, as we discuss next.

**D. Data splitting with randomization achieves exact coverage.** Here, we stay in the setting and notation of the previous  
 subsection and demonstrate how randomizing the  $\beta$ -quantile enables a data splitting approach to achieve exact coverage. For  
 any score function of the form in Eq. [S7], any miscoverage level,  $\alpha \in (0, 1)$ , the *randomized split conformal* confidence set is  
 the following random variable for  $x \in \mathcal{X}$ :

$$C_\alpha^{\text{rand,split}}(x) = \left\{ y \in \mathbb{R} : S(x, y) \leq \text{RANDOMIZEDQUANTILE}_{1-\alpha} \left( (S_1, \dots, S_m, S(x, y)), (w_1(x), \dots, w_{m+1}(x)) \right) \right\}, \quad [S10]$$

69 where the randomized  $\beta$ -quantile,  $\text{RANDOMIZEDQUANTILE}_\beta$  is defined in Eq. [S3],  $S_i = S(X_i, Y_i)$  for  $i = 1, \dots, m$ , and  $w_i(\cdot)$   
 70 for  $i = 1, \dots, m + 1$  is defined in Eq. [S9]. Observe that for each candidate label,  $y \in \mathbb{R}$ , an independent randomized  $\beta$ -quantile  
 71 is drawn, such that the scores of some values are compared to the  $\beta$ -quantile while the others are compared to the  $\beta$ -quantile  
 72 lower bound. The exact coverage property of this confidence set is a consequence of Theorem S2.

73 **Corollary 1.** *Suppose calibration and test data,  $Z_1, \dots, Z_m, Z_{\text{test}}$ , are under standard covariate shift, and assume  $\tilde{P}_{X;\mu}$  is*  
 74 *absolutely continuous with respect to  $P_X$ . For score functions of the form in Eq. [S7], and any miscoverage level,  $\alpha \in (0, 1)$ , the*  
 75 *randomized split conformal confidence set,  $C_\alpha^{\text{rand,split}}(x)$ , in Eq. [S10] satisfies the exact coverage property in Eq. [S5].*

76 *Proof.* Since standard covariate shift is a special case of FCS, the calibration and test data can be described by FCS where  $\tilde{P}_{X;D} =$   
 77  $\tilde{P}_{X;\mu}$  for any multiset  $D$ . The randomized split conformal confidence set,  $C_\alpha^{\text{rand,split}}$ , is simply the randomized full conformal  
 78 confidence set,  $C_\alpha^{\text{rand}}$ , defined in Eq. [S4], instantiated with the scores  $S((x, y), Z_{1:m}) = S(x, y)$  and  $S(Z_i, Z_{-i} \cup \{(x, y)\}) = S(Z_i)$   
 79 for  $i = 1, \dots, m$ , and weights resulting from  $\tilde{P}_{X;D} = \tilde{P}_{X;\mu}$  for all  $D$ . The result then follows from Theorem S2.  $\square$

80 While we only need to fit a single regression model to compute the scores for data splitting, naively it might seem that in  
 81 practice, we need to approximate  $C_\alpha^{\text{rand,split}}(x)$  by introducing a discrete grid of candidate labels,  $\mathcal{Y} \subset \mathbb{R}$ , and computing a  
 82 randomized  $\beta$ -quantile for  $|\mathcal{Y}|$  different discrete distributions. Fortunately, we can construct an alternative confidence set that  
 83 also achieves exact coverage, the *randomized staircase* confidence set,  $C_\alpha^{\text{staircase}}$ , which only requires sorting  $m$  scores and an  
 84 additional  $O(m)$  floating point operations to compute (see Alg. S1).

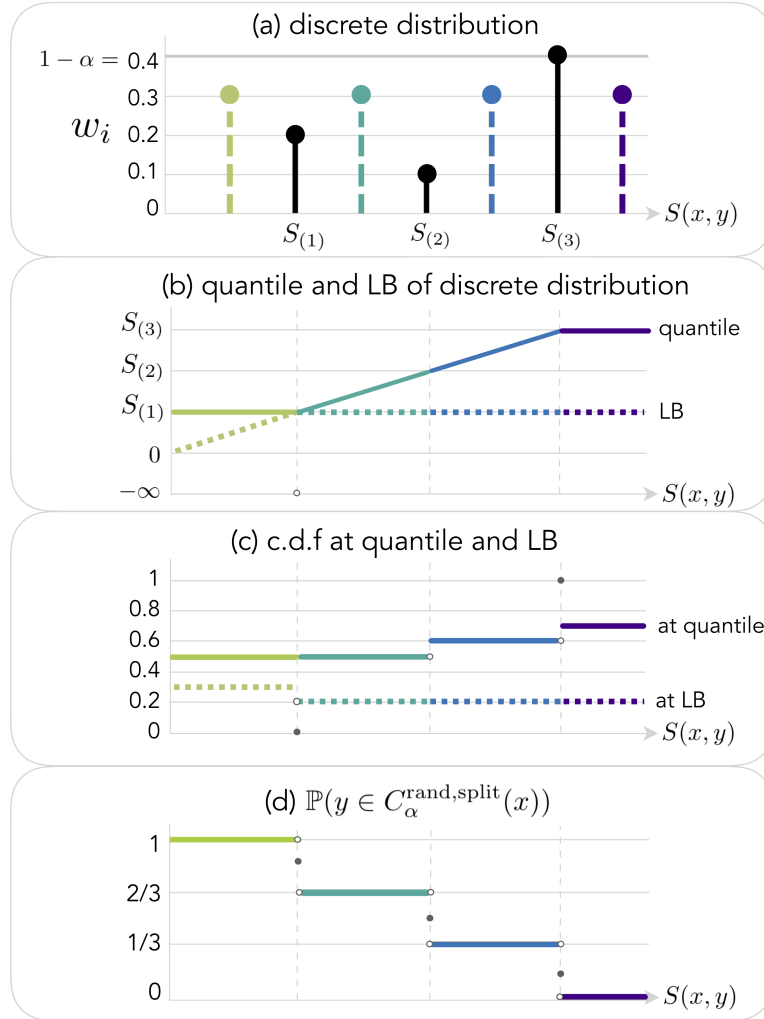

color legend:

| $S(x, y) \in [0, S_{(1)})$                                                                | $S(x, y) \in (S_{(1)}, S_{(2)})$                                                                                                              | $S(x, y) \in (S_{(2)}, S_{(3)})$                                                                                                                          | $S(x, y) \in (S_{(3)}, \infty]$                                                           |
|-------------------------------------------------------------------------------------------|-----------------------------------------------------------------------------------------------------------------------------------------------|-----------------------------------------------------------------------------------------------------------------------------------------------------------|-------------------------------------------------------------------------------------------|
| QUANTILE = $S_{(1)} > S(x, y)$<br>$\mathbb{P}(y \in C_\alpha^{\text{rand,split}}(x)) = 1$ | QUANTILE = $S(x, y)$<br>QUANTILELB = $S_{(1)}$<br>QF = $0.2 + 0.3$<br>LF = $0.2$<br>$\mathbb{P}(y \in C_\alpha^{\text{rand,split}}(x)) = 2/3$ | QUANTILE = $S(x, y)$<br>QUANTILELB = $S_{(2)}$<br>QF = $0.2 + 0.1 + 0.3$<br>LF = $0.2 + 0.1$<br>$\mathbb{P}(y \in C_\alpha^{\text{rand,split}}(x)) = 1/3$ | QUANTILE = $S_{(3)} < S(x, y)$<br>$\mathbb{P}(y \in C_\alpha^{\text{rand,split}}(x)) = 0$ |

**Fig. S1.** Depiction of how the probability  $\mathbb{P}(y \in C_\alpha^{\text{rand,split}}(x))$  is a piecewise constant function of  $y$ . (a) Given the values of the calibration data and test input, the scores  $S_1, \dots, S_m$  and corresponding probability masses  $w_1, \dots, w_m$  (black stems), as well as the probability mass for the test input,  $w_{m+1} = 0.3$ , are fixed. The only quantity that depends on  $y$  is  $S(x, y)$ . Four example values are shown as dashed green, teal, blue, and purple stems, representing values in  $[0, S_{(1)})$ ,  $(S_{(1)}, S_{(2)})$ ,  $(S_{(2)}, S_{(3)})$ , and  $(S_{(3)}, \infty]$ , respectively (see color legend). Note that in this example,  $1 - \alpha = 0.4$ . (b) The 0.4-quantile and 0.4-quantile lower bound of the discrete distribution in the top panel as a function of  $S(x, y)$ , where the colors correspond to values of  $S(x, y)$  in the intervals just listed. Note the discontinuity in the 0.4-quantile lower bound at  $S(x, y) = S_{(1)}$ . (c) The c.d.f. of the discrete distribution at the 0.4-quantile and 0.4-quantile lower bound. Note the discontinuities when  $S(x, y)$  equals a calibration score. (d) The probability  $\mathbb{P}(y \in C_\alpha^{\text{rand,split}}(x))$ , which equals 1 or 0 if  $S(x, y) = 0.4$ -quantile lower bound or  $S(x, y) > 0.4$ -quantile, respectively, and otherwise equals the probability in Eq. [S3] that the randomized 0.4-quantile equals the 0.4-quantile:  $1 - \frac{\text{QF} - 0.4}{\text{QF} - \text{LF}}$ , where QF and LF denote the c.d.f. at the 0.4-quantile and 0.4-quantile lower bound, respectively. Color legend: calculations of the plotted quantities (calculations for  $S(x, y) = S_{(i)}$  omitted).

85 At a high level, its construction is based on the observation that for any  $x \in \mathcal{X}$  and  $y \in \mathbb{R}$ , the quantity  $\mathbb{P}(y \in C_\alpha^{\text{rand,split}}(x))$ ,  
 86 where the probability is over the randomness in  $C_\alpha^{\text{rand,split}}(x)$ , is a piecewise constant function of  $y$ . Instead of testing each  
 87 value of  $y \in \mathbb{R}$ , we can then construct this piecewise constant function, and randomly include entire intervals of  $y$  values that

---

**Algorithm S1** Randomized staircase confidence set
 

---

**Input:** Misscoverage level,  $\alpha \in (0, 1)$ ; calibration data,  $Z_1, \dots, Z_m$ , where  $Z_i = (X_i, Y_i)$ ; test input,  $X_{\text{test}}$ ; subroutine for likelihood ratio function,  $v(\cdot)$ , defined in Eq. [S6]; subroutine for uncertainty heuristic,  $u(\cdot)$ ; subroutine for regression model prediction,  $\mu(\cdot)$ .

**Output:** Randomized staircase confidence set,  $C = C_{\alpha}^{\text{staircase}}(X_{\text{test}})$ .

```

1: for  $i = 1, \dots, m$  do ▷ Compute calibration scores
2:    $S_i \leftarrow |Y_i - \mu(X_i)|/u(X_i)$ 
3:    $v_i \leftarrow v(X_i)$ 
4:  $v_{m+1} \leftarrow v(X_{\text{test}})$ 
5: for  $i = 1, \dots, m+1$  do ▷ Compute calibration and test weights
6:    $w_i \leftarrow v_i / \sum_{j=1}^{m+1} v_j$ 
7:  $C \leftarrow \emptyset$ 
8: LowerBoundIsSet  $\leftarrow$  False
9:  $S_{(0)} = 0, w_0 = 0$  ▷ Dummy values so for-loop will include  $[0, S_{(1)}]$ 
10: for  $i = 0, \dots, m-1$  do
11:   if  $\sum_{j: S_j \leq S_{(i)}} w_j + w_{m+1} < 1 - \alpha$  then ▷  $S(x, y) \leq \beta$ -quantile lower bound, so include deterministically
12:      $C = C \cup [\mu(X_{\text{test}}) + S_{(i)} \cdot u(X_{\text{test}}), \mu(X_{\text{test}}) + S_{(i+1)} \cdot u(X_{\text{test}})] \cup [\mu(X_{\text{test}}) - S_{(i+1)} \cdot u(X_{\text{test}}), \mu(X_{\text{test}}) - S_{(i)} \cdot u(X_{\text{test}})]$ 
13:   else if  $\sum_{j: S_j \leq S_{(i)}} w_j + w_{m+1} \geq 1 - \alpha$  and  $\sum_{j: S_j \leq S_{(i)}} w_j < 1 - \alpha$  then ▷  $S(x, y) = \beta$ -quantile, so randomize inclusion
14:     if LowerBoundIsSet = False then
15:       LowerBoundIsSet  $\leftarrow$  True ▷ Set  $\beta$ -quantile lower bound
16:        $LF = \sum_{j: S_j \leq S_{(i)}} w_j$ 
17:        $F \leftarrow \frac{\sum_{j: S_j \leq S_{(i)}} w_j + w_{m+1} - (1-\alpha)}{\sum_{j: S_j \leq S_{(i)}} w_j + w_{m+1} - LF}$ 
18:        $b \sim \text{Bernoulli}(1 - F)$ 
19:       if  $b$  then
20:          $C = C \cup [\mu(X_{\text{test}}) + S_{(i)} \cdot u(X_{\text{test}}), \mu(X_{\text{test}}) + S_{(i+1)} \cdot u(X_{\text{test}})] \cup [\mu(X_{\text{test}}) - S_{(i+1)} \cdot u(X_{\text{test}}), \mu(X_{\text{test}}) - S_{(i)} \cdot u(X_{\text{test}})]$ 
21:   if  $\sum_{i=1}^m w_i < 1 - \alpha$  then ▷ For  $S(x, y) > S_{(m)}$ , either  $S(x, y) = \beta$ -quantile or  $S(x, y) > \beta$ -quantile
22:     if LowerBoundIsSet = False then
23:        $LF = \sum_{i=1}^m w_i$ 
24:        $F \leftarrow \frac{1 - (1-\alpha)}{1 - LF}$ 
25:        $b \sim \text{Bernoulli}(1 - F)$ 
26:       if  $b$  then
27:          $C = C \cup [\mu(X_{\text{test}}) + S_{(m)} \cdot u(X_{\text{test}}), \infty] \cup [-\infty, \mu(X_{\text{test}}) - S_{(m)} \cdot u(X_{\text{test}})]$ 

```

---

88 have the same value of  $\mathbb{P}(y \in C_{\alpha}^{\text{rand,split}}(x))$ .

89 Fig. S1 illustrates this observation, which we now explain. First, the discrete distribution in Eq. [S10] has probability  
90 masses  $w_1(x), \dots, w_{m+1}(x)$  at the points  $S_1, \dots, S_m, S(x, y)$ , respectively. Given the values of the  $m$  calibration data points  
91 and the test input,  $x$ , all of these quantities are fixed—except for the score of the candidate test data point,  $S(x, y)$ . That  
92 is, the only quantity that depends on the value of  $y$  is  $S(x, y)$ , which is the location of the probability mass  $w_{m+1}(x)$ ; the  
93 remaining  $m$  support points and their corresponding probability masses do not change with  $y$ .

94 Now consider the calibration scores,  $S_1, \dots, S_m$ , sorted in ascending order. Observe that for any pair of successive sorted  
95 scores,  $S_{(i)}$  and  $S_{(i+1)}$ , the entire interval of  $y$  values such that  $S(x, y) \in (S_{(i)}, S_{(i+1)})$  belongs to one of three categories:  
96  $S(x, y) \leq \beta$ -quantile lower bound (of the discrete distribution with probability masses  $w_1, \dots, w_{m+1}$  at support points  
97  $S_1, \dots, S_m, S(x, y)$ ),  $S(x, y) = \beta$ -quantile, or  $S(x, y) > \beta$ -quantile. An interval of  $y$  values that belongs to the first category  
98 is deterministically included in  $C_{\alpha}^{\text{rand,split}}(x)$ , regardless of the randomness in the randomized  $\beta$ -quantile (color-coded green  
99 in Fig. S1), while an interval that belongs to the last category is deterministically excluded (color-coded purple in Fig. S1).  
100 The only  $y$  values whose inclusion is not deterministic are those in the second category (color-coded teal and blue), which are  
101 randomly included with the probability, given in Eq. [S3], that the randomized  $\beta$ -quantile equals the  $\beta$ -quantile. Consequently,  
102 we can identify the intervals of  $y$  values belonging to each of these categories, and for those in the second category, compute  
103 the probability that the randomized  $\beta$ -quantile is instantiated as the  $\beta$ -quantile, which is  $\mathbb{P}(y \in C_{\alpha}^{\text{rand,split}}(x))$ .

104 This probability turns out to be a piecewise constant function of  $y$ . Note that it is computed from two quantities: the c.d.f.  
105 at the  $\beta$ -quantile and the c.d.f. at the  $\beta$ -quantile lower bound (see Eq. [S3]). As depicted in Fig. S1 (third panel from top), for  
106 any two successive sorted calibration scores,  $S_{(i)}$  and  $S_{(i+1)}$ , both of these quantities are constant over  $S(x, y) \in (S_{(i)}, S_{(i+1)})$ .  
107 That is, both the c.d.f. at the  $\beta$ -quantile and the c.d.f. at  $\beta$ -quantile lower bound are piecewise constant functions of  $y$ , which  
108 only change values at the calibration scores,  $S_1, \dots, S_m$  (and can take on different values exactly at the calibration scores).  
109 Consequently, the probability  $\mathbb{P}(y \in C_{\alpha}^{\text{rand,split}}(x))$  is also a piecewise constant function of  $y$ , which only changes values at the  
110 calibration scores. It attains its highest value at  $\mu(x)$  and decreases as  $y$  moves further away from it, resembling a staircase, as  
111 depicted in Fig. S1 (fourth panel from the top).

112 Therefore, instead of computing a randomized  $\beta$ -quantile for all  $y \in \mathbb{R}$ , we can simply compute the value of this probability  
113 on the  $m+1$  intervals between neighboring sorted calibration scores:  $[0, S_{(1)}), (S_{(1)}, S_{(2)}), \dots, (S_{(m-1)}, S_{(m)}), (S_{(m)}, \infty]$ , as well  
114 as its value exactly at the  $m$  calibration scores. These probabilities may equal 1 or 0, which correspond to the two cases  
115 earlier described wherein  $y$  is deterministically included or excluded, respectively. If the probability is not 1 or 0, then we can  
116 randomly include the entire set of values of  $y$  such that  $S(x, y)$  falls in the interval. Due to the form of the score in Eq. [S7],  
117 this set comprises two equal-length intervals on both sides of  $\mu(x)$ :  $(\mu(x) - S_{(i+1)}, \mu(x) - S_{(i)}) \cup (\mu(x) + S_{(i+1)}, \mu(x) + S_{(i)})$ .



118 Finally, if we assume that scores are distinct almost surely, then our treatment of values of  $y$  such that  $S(x, y) = S_i$  for  
 119  $i = 1, \dots, m$ , does not affect the exact coverage property. For simplicity, Alg. S1 therefore includes or excludes closed intervals  
 120 that contain these  $y$  values as endpoints, rather than treating them separately.

121 **More general score functions.** In the reasoning above, we use the assumption that the score function takes the form in Eq. [S7]  
 122 only at the end of the argument, to infer the form of the sets of  $y$  values. We can relax this assumption as follows. For any  
 123 continuous score function, consider the preimage of the intervals  $[0, S_{(1)}), (S_{(1)}, S_{(2)}), \dots, (S_{(m-1)}, S_{(m)}), (S_{(m)}, \infty]$  under the  
 124 function  $S(x, \cdot)$  (a function of the second argument with  $x$  held fixed), rather than the intervals given explicitly in Lines 12,  
 125 20, and 27 of Alg. S1. This algorithm then gives exact coverage for any continuous score function, although it will only be  
 126 computationally feasible when these preimages can be computed efficiently.

## 127 S2. Efficient computation of the full conformal confidence set for ridge regression and Gaussian process regres- 128 sion

129 **A. Ridge regression.** When the likelihood of the test input is a function of the prediction from a ridge regression model, it  
 130 is possible to compute the scores and weights for the full conformal confidence set by fitting  $n + 1$  models and  $O(n \cdot p \cdot |\mathcal{Y}|)$   
 131 additional floating point operations, instead of naively fitting  $(n + 1) \times \mathcal{Y}$  models, as demonstrated in Alg. S2.

For the fluorescent protein design experiments, the TESTINPUTLIKELIHOOD subroutine in Alg. S2 computed the likelihood  
 in Eq. [6], that is,

$$\begin{aligned} \text{TESTINPUTLIKELIHOOD}(a_i + b_i y) &\leftarrow \frac{\exp(\lambda \cdot (a_i + b_i y))}{\sum_{x \in \mathcal{X}} \exp(\lambda \cdot (C_i + y \mathbf{A}_{-i, n})^T x)}, \\ \text{TESTINPUTLIKELIHOOD}(a_{n+1}) &\leftarrow \frac{\exp(\lambda \cdot a_{n+1})}{\sum_{x \in \mathcal{X}} \exp(\lambda \cdot \beta^T x)}, \end{aligned} \quad [\text{S11}]$$

132 where the input space  $\mathcal{X}$  was the combinatorially complete set of 8,192 sequences. The TRAININPUTLIKELIHOOD subroutine  
 133 returned the likelihood under the training input distribution, which is simply equal to  $1/8192$ , since training sequences were  
 134 sampled uniformly from the combinatorially complete data set. See <https://github.com/clarafy/conformal-for-design> for  
 135 an implementation.

136 Computing the test input likelihoods was dominated by the  $(n + 1) \times |\mathcal{Y}|$  normalizing constants, which can be computed  
 137 efficiently using a single tensor product between an  $(n + 1) \times p \times |\mathcal{Y}|$  tensor containing the model parameters,  $C_i + y \mathbf{A}_{-i, n}$  and  
 138  $\beta$ , and an  $|\mathcal{X}| \times p$  data matrix containing all inputs in  $\mathcal{X}$ . For domains,  $\mathcal{X}$ , that are too large for the normalizing constants to  
 139 be computed exactly, one can turn to tractable Monte Carlo approximations.

---

### Algorithm S2 Efficient computation of scores and weights for ridge regression-based feedback covariate shift

---

**Input:** training data,  $Z_1, \dots, Z_n$ , where  $Z_i = (X_i, Y_i)$ ; test input,  $X_{n+1}$ ; grid of candidate labels,  $\mathcal{Y} \subset \mathbb{R}$ ; subroutine for test input likelihood, TESTINPUTLIKELIHOOD( $\cdot$ ), that takes an input's predicted fitness and outputs its likelihood under the test input distribution; subroutine for training input likelihood, TRAININPUTLIKELIHOOD( $\cdot$ ).

**Output:** scores  $S_i(X_{n+1}, y)$  and likelihood ratios  $v(X_i, Z_{-i}^y)$  for  $i = 1, \dots, n + 1$ ,  $y \in \mathcal{Y}$ .

```

1: for  $i = 1, \dots, n$  do
2:    $C_i \leftarrow \sum_{j=1}^{n-1} Y_{-i, j} \mathbf{A}_{-i, j}$ 
3:    $a_i \leftarrow C_i^T X_i$ 
4:    $b_i \leftarrow \mathbf{A}_{-i, n}^T X_i$ 
5:  $\beta \leftarrow (\mathbf{X}^T \mathbf{X} + \gamma I)^{-1} \mathbf{X}^T \mathbf{Y}$ 
6:  $a_{n+1} \leftarrow \beta^T X_{n+1}$ 
7: for  $i = 1, \dots, n$  do
8:   for  $y \in \mathcal{Y}$  do
9:      $S_i(X_{n+1}, y) \leftarrow |Y_i - (a_i + b_i y)|$  ▷ Can vectorize via outer product between  $(b_1, \dots, b_n)$  and vector of all  $y \in \mathcal{Y}$ .
10:     $v(X_i; Z_{-i, y}) \leftarrow \text{TESTINPUTLIKELIHOOD}(a_i + b_i y) / \text{TRAININPUTLIKELIHOOD}(X_i)$  ▷ Can vectorize (see commentary on Eq. [S11]).
11:  $S_{n+1}(X_{n+1}, y) \leftarrow |y - a_{n+1}|$ 
12:  $v(X_{n+1}; Z_{1:n}) \leftarrow \text{TESTINPUTLIKELIHOOD}(a_{n+1}) / \text{TRAININPUTLIKELIHOOD}(X_{n+1})$ 

```

---

140 **B. Gaussian process regression.** Here we describe how the scores and weights for the confidence set in Eq. [3] can be computed  
 141 efficiently, when the likelihood of the test input distribution is a function of the predictive mean and variance of a Gaussian  
 142 process regression model.

For an arbitrary kernel and two data matrices,  $\mathbf{V} \in \mathbb{R}^{n_1 \times p}$  and  $\mathbf{V}' \in \mathbb{R}^{n_2 \times p}$ , let  $K(\mathbf{V}, \mathbf{V}')$  denote the  $n_1 \times n_2$  matrix where  
 the  $(i, j)$ -th entry is the covariance between the  $i$ -th row of  $\mathbf{V}$  and  $j$ -th row of  $\mathbf{V}'$ . The mean prediction for  $X_i$  of a Gaussian  
 process regression model fit to the  $i$ -th augmented LOO data set,  $\mu_{-i}^y(X_i)$ , is then given by

$$\mu_{-i}^y(X_i) = K(X_i, \mathbf{X}_{-i}) [K(\mathbf{X}_{-i}, \mathbf{X}_{-i}) + \sigma^2 I]^{-1} Y_{-i}^y,$$

and the model's predictive variance at  $X_i$  is

$$K(X_i, X_i) - K(X_i, \mathbf{X}_{-i}) [K(\mathbf{X}_{-i}, \mathbf{X}_{-i}) + \sigma^2 I]^{-1} K(\mathbf{X}_{-i}, X_i),$$

143 where the rows of the matrix  $\mathbf{X}_{-i} \in \mathbb{R}^{n \times p}$  are the inputs in  $Z_{-i}^y$ ,  $Y_{-i}^y = (Y_{-i}, y) \in \mathbb{R}^n$  is the vector of labels in  $Z_{-i}^y$ , and  $\sigma^2$  is  
 144 the (unknown) variance of the label noise, whose value is set as a hyperparameter. Note that the mean prediction is a linear  
 145 function of the candidate value,  $y$ , which is of the same form as the ridge regression prediction in Eq. [5]; furthermore, the  
 146 predictive variance is constant over  $y$ . Therefore, we can mimic Alg. S2 to efficiently compute scores and weights by training  
 147 just  $n + 1$  rather than  $(n + 1) \times |\mathcal{Y}|$  models.

### 148 S3. Additional details and results on designing fluorescent proteins

149 **Features** Each sequence was first represented as a length-thirteen vector of signed bits ( $-1$  or  $1$ ), each denoting which of  
 150 the two wild-type parents the amino acid at a site matches. The features for the sequence consisted of these thirteen signed  
 151 bits, called the first-order terms in the main text, as well as all  $\binom{13}{2}$  products between pairs of these thirteen bits, called the  
 152 second-order interaction terms.

153 **Additional simulated measurement noise.** Each time the  $i$ -th sequence in the combinatorially complete data set was sampled,  
 154 for either training or designed data, we introduced additional simulated measurement noise using the following procedure.  
 155 Poelwijk et al. (8) found that the Walsh-Hadamard transform of the brightness fitness landscape included up to seventh-order  
 156 statistically significant terms. Accordingly, we fit a linear model of up to seventh-order terms for each of the combinatorially  
 157 complete data sets, then estimated the standard deviation of the  $i$ -th sequence’s measurement noise,  $\sigma_i$ , as the residual between  
 158 its label and this model’s prediction. Each time the  $i$ -th sequence was sampled, for either training or designed data, we also  
 159 sampled zero-mean Gaussian noise with standard deviation  $\sigma_i$  and added it to the  $i$ -th sequence’s label. This was done to  
 160 simulate the fact that multiple measurements of the same sequence will yield different labels, due to measurement noise.

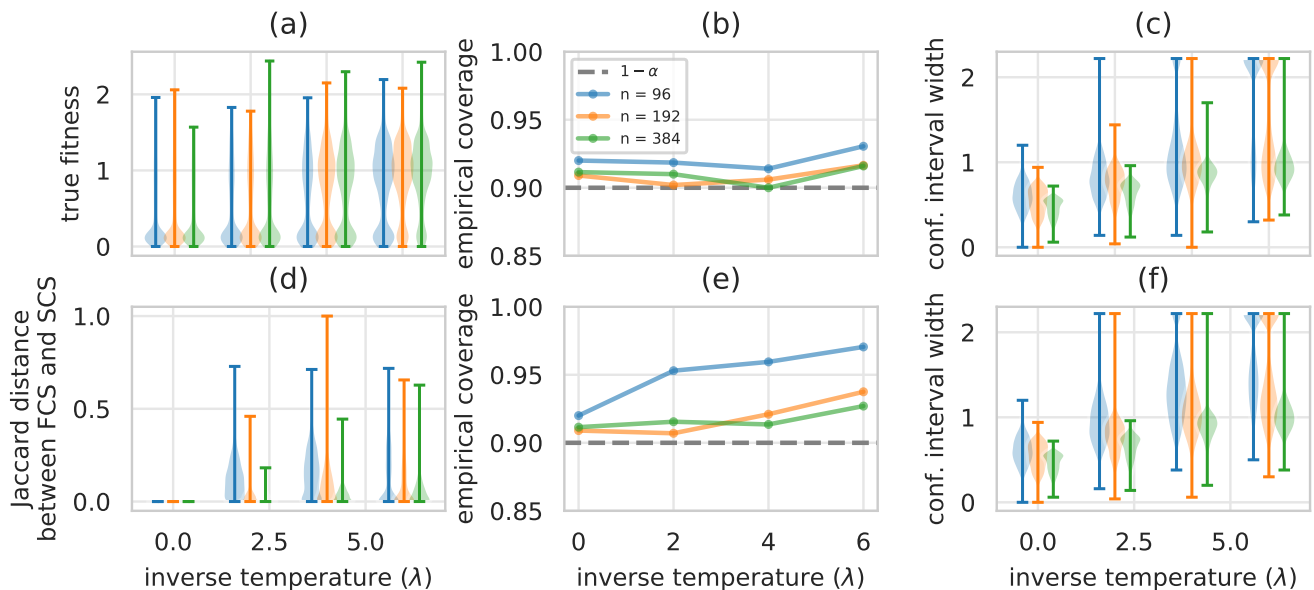

**Fig. S2.** Quantifying predictive uncertainty for designed proteins, using the red fluorescence data set. (a) Distributions of labels of designed proteins, for different values of the inverse temperature,  $\lambda$ , and different amounts of training data,  $n$ . Labels surpass the fitness range observed in the combinatorially complete data set,  $[0.025, 1.692]$ , due to additional simulated measurement noise. (b) Empirical coverage, compared to the theoretical lower bound of  $1 - \alpha = 0.9$  (dashed gray line), and (c) distributions of confidence interval widths achieved by full conformal prediction for feedback covariate shift (our method) over  $T = 2000$  trials. (d) Distributions of Jaccard distances between the confidence intervals produced by full conformal prediction for feedback covariate shift and standard covariate shift (1). (e, f) Same as (b, c) but using full conformal prediction for standard covariate shift. In (a), (c), (d), and (f), the whiskers signify the minimum and maximum observed values.

### 161 S4. Additional details on AAV experiments

162 **NNK sequence distribution.** The NNK sequence distribution is parameterized by independent categorical distributions over  
 163 the four nucleotides, where the probabilities of the nucleotides are intended to result in a high diversity of amino acids while  
 164 avoiding stop codons. Specifically, for three contiguous nucleotides corresponding to a codon, the first two nucleotides are  
 165 sampled uniformly at random from  $\{A, C, T, G\}$ , while the last nucleotide is sampled uniformly at random from only  $\{T, G\}$ .

**Additional simulated measurement noise.** Following Zhu & Brookes et al. (9), the fitness assigned to the  $i$ -th sequence was an enrichment score based on its counts before and after a selection experiment,  $n_{i,\text{pre}}$  and  $n_{i,\text{post}}$ , respectively. The variance of this enrichment score for the  $i$ -th sequence was estimated as

$$\sigma_i^2 = \frac{1}{n_{i,\text{post}}} \left( 1 - \frac{n_{i,\text{post}}}{N_{\text{post}}} \right) + \frac{1}{n_{i,\text{pre}}} \left( 1 - \frac{n_{i,\text{pre}}}{N_{\text{pre}}} \right)$$

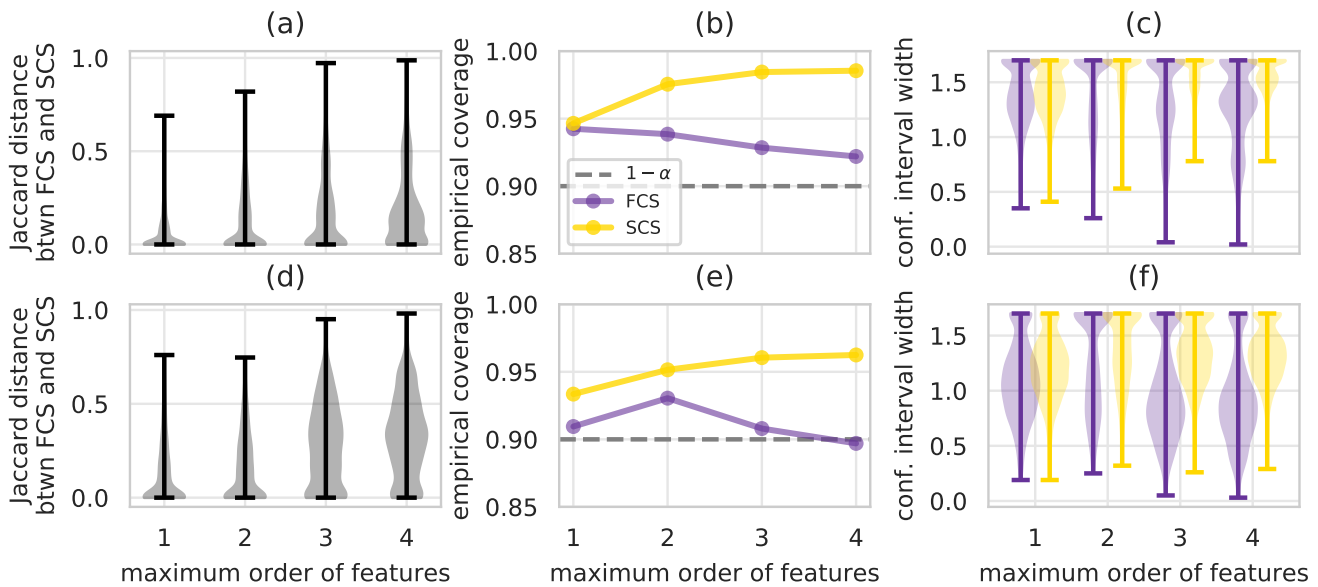

**Fig. S3.** Quantifying predictive uncertainty for designed proteins using the blue and red fluorescence data sets, for  $n = 48$  training data points,  $\lambda = 6$ , and ridge regression models with features of varying complexity. In particular, the features consist of all interaction terms up to order  $d$  between the thirteen sequence sites, where the maximum order,  $d$ , is the  $x$ -axis of the following subplots. (a) Distributions of Jaccard distances between the confidence intervals produced by conformal prediction for feedback covariate shift (FCS, our method) and standard covariate shift (SCS) (1) for the blue data set over  $T = 2000$  trials. (b) Empirical coverage, compared to the theoretical lower bound of  $1 - \alpha = 0.9$  (dashed gray line), achieved by conformal prediction for FCS and SCS over those trials. (c) Distributions of confidence interval widths using conformal prediction for FCS and SCS. (d-f) Same as (a-c) but for the red fluorescence data set. In (a), (c), (d), and (f), whiskers signify the minimum and maximum observed values.

166 where  $N_{\text{pre}}$  and  $N_{\text{post}}$  denote the total counts of all the sequences before and after the selection experiment, respectively. Using  
 167 this estimate, we introduced additional simulated measurement noise to the label of the  $i$ -th sequence by adding zero-mean  
 168 Gaussian noise with a variance of  $0.1 \cdot \sigma_i^2$ .

169 **Neural network details.** As in (9), the neural network took one-hot-encoded sequences as inputs and had an architecture  
 170 consisting of two fully connected hidden layers, with 100 units each and `tanh` activation functions. It was fit to the 7,552,729  
 171 training data points with the built-in implementation of the Adam algorithm in Tensorflow, using the default hyperparameters  
 172 and a batch size of 64 for 10 epochs, where each training data point was weighted according to its estimated variance as in (9).

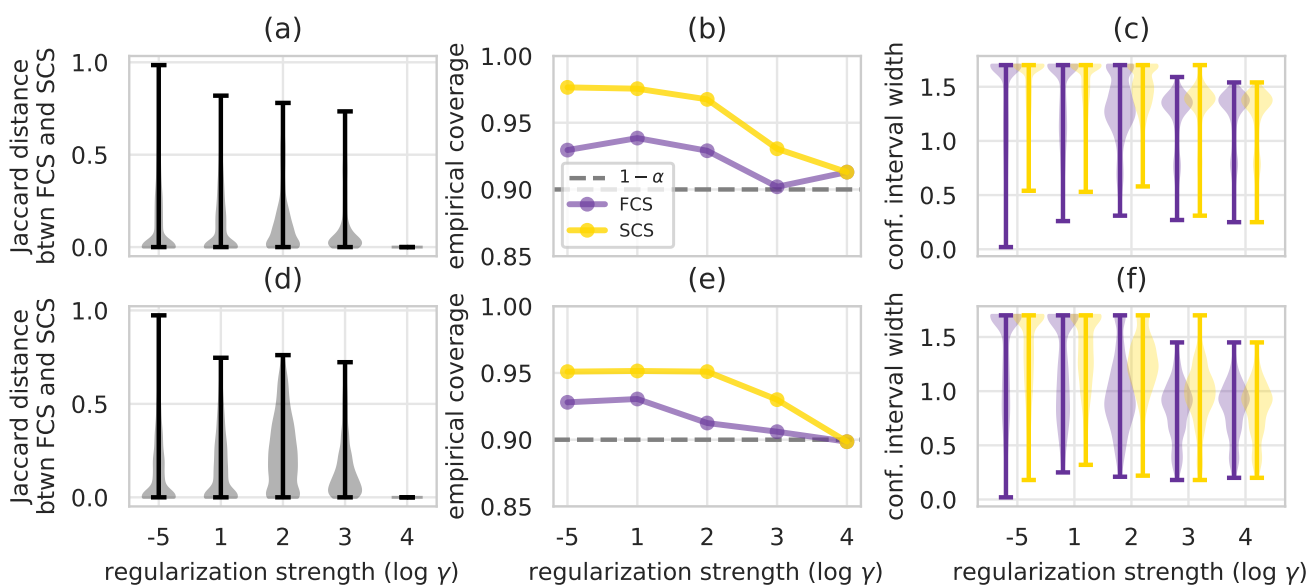

**Fig. S4.** Quantifying predictive uncertainty for designed proteins using the blue and red fluorescence data sets, for  $n = 48$  training data points,  $\lambda = 6$ , and varying ridge regularization strength,  $\gamma$ . (a) Distributions of Jaccard distances between the confidence intervals produced by conformal prediction for feedback covariate shift (FCS, our method) and standard covariate shift (SCS) (1) for the blue data set over  $T = 2000$  trials. (b) Empirical coverage, compared to the theoretical lower bound of  $1 - \alpha = 0.9$  (dashed gray line), achieved by conformal prediction for FCS and SCS over those trials. (c) Distributions of confidence interval widths using conformal prediction for FCS and SCS. (d-f) Same as (a-c) but for the red fluorescence data set. In (a), (c), (d), and (f), whiskers signify the minimum and maximum observed values.

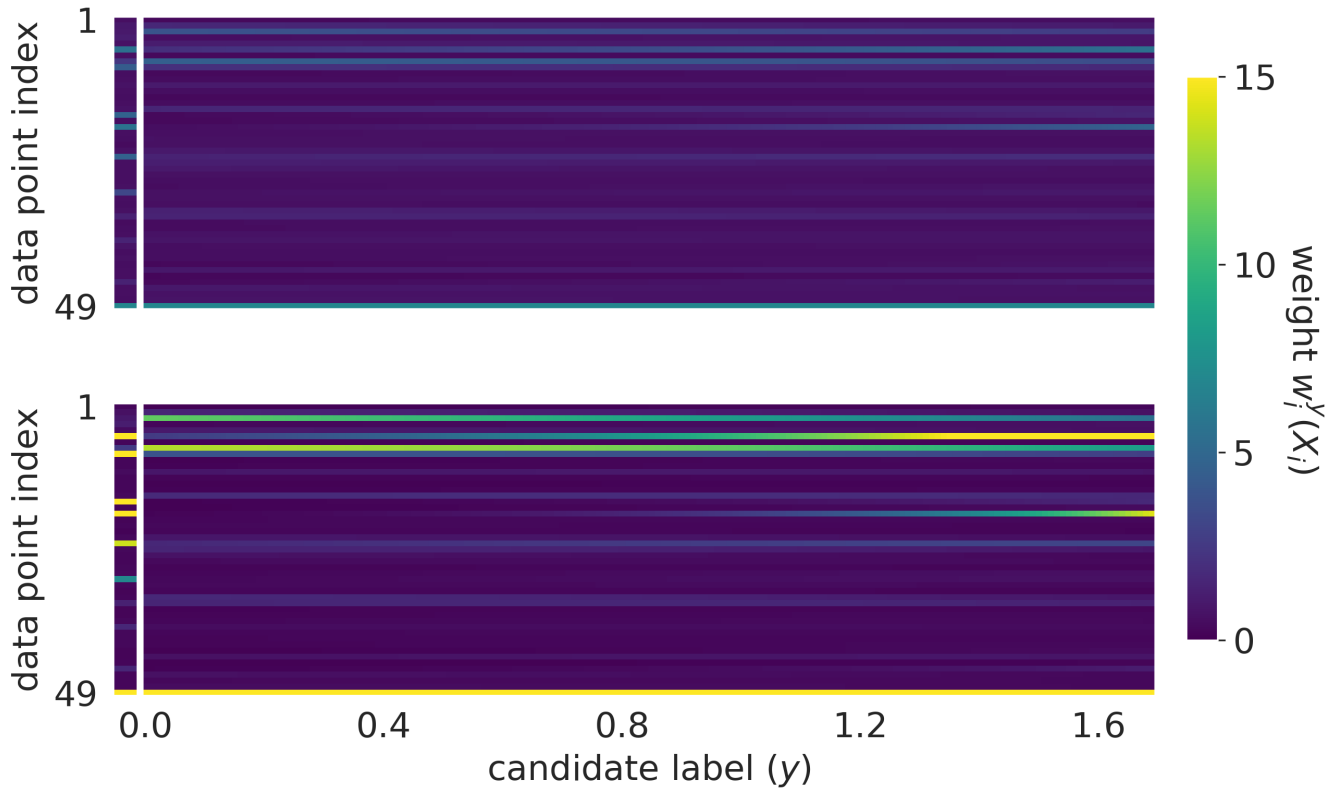

**Fig. S5.** Comparison between the weights constructed by conformal prediction for feedback covariate shift (FCS, our method) and standard covariate shift (SCS) (1) for one example training data set and resulting designed sequence, for  $n = 48$  with the blue fluorescence data set and two different settings of the inverse temperature,  $\lambda$ . Top: For  $\lambda = 2$ , vector of the  $n + 1$  weights prescribed under SCS for the  $n$  training data points (data point indices 1 through 48) and the candidate test data points (data point index 49), alongside  $(n + 1) \times |\mathcal{Y}|$  matrix of the weights prescribed under FCS for those same  $n + 1$  training and candidate test data points. The weight for each of these data points depends on the candidate label,  $y$  ( $x$ -axis of heatmap), through a linear relationship with  $y$  (see Section D). Bottom: same as top but for  $\lambda = 6$ .

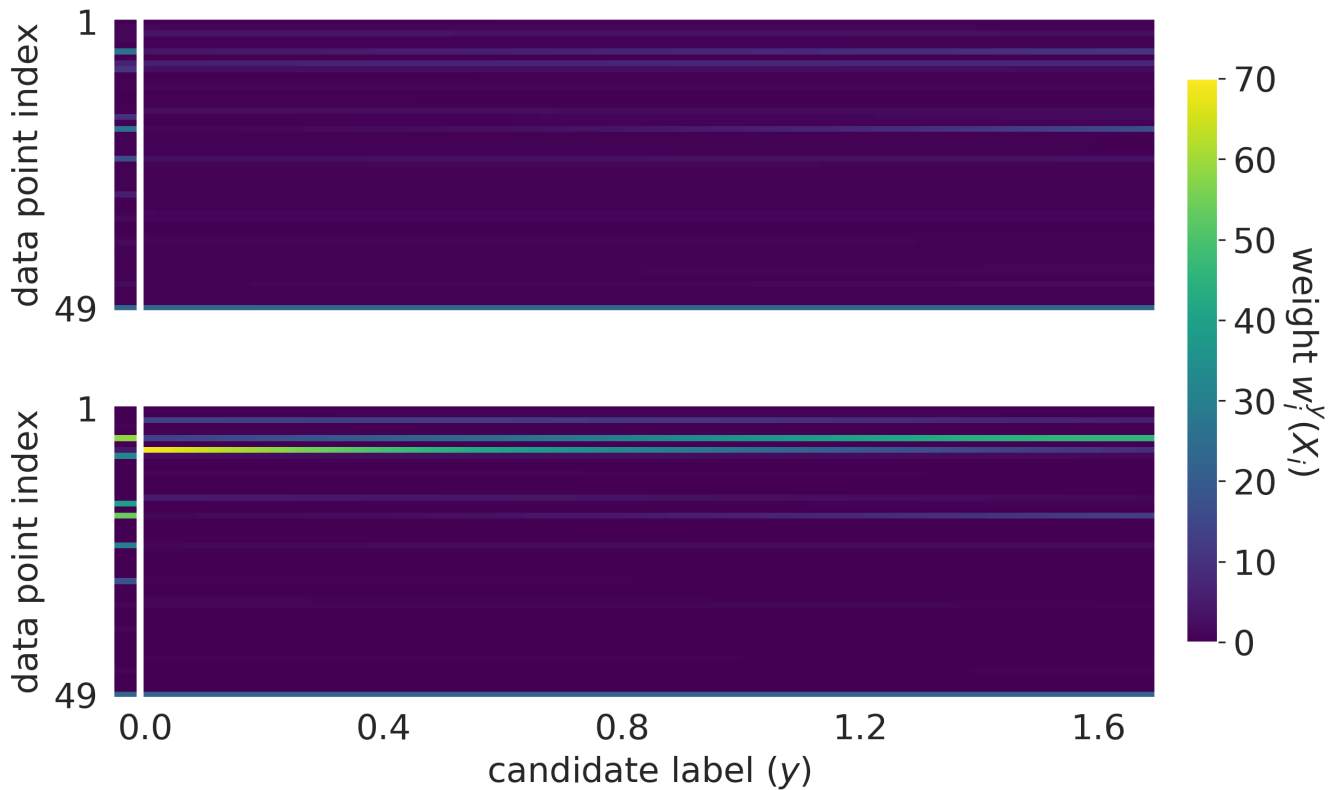

**Fig. S6.** Comparison between the weights constructed by conformal prediction for feedback covariate shift (FCS, our method) and standard covariate shift (SCS) (1) for one example training data set and resulting designed sequence, for  $n = 48$  with the blue fluorescence data set and two different settings of the ridge regularization strength,  $\gamma$ . Top: For  $\gamma = 100$ , vector of the  $n + 1$  weights prescribed under SCS for the  $n$  training data points (data point indices 1 through 48) and the candidate test data points (data point index 49), alongside  $(n + 1) \times |\mathcal{Y}|$  matrix of the weights prescribed under FCS for those same  $n + 1$  training and candidate test data points. The weight for each of these data points depends on the candidate label,  $y$  ( $x$ -axis of heatmap), through a linear relationship with  $y$  (see Section D). Bottom: same as top but for  $\gamma = 10$ .

173 **References**

174 1. RJ Tibshirani, R Foygel Barber, E Candes, A Ramdas, Conformal prediction under covariate shift in *Advances in Neural*  
175 *Information Processing Systems*. Vol. 32, pp. 2530–2540 (2019).

176 2. H Papadopoulos, K Proedrou, V Vovk, A Gammerman, Inductive confidence machines for regression in *Machine Learning:*  
177 *European Conference on Machine Learning*. pp. 345–356 (2002).

178 3. J Lei, M G’Sell, A Rinaldo, RJ Tibshirani, L Wasserman, Distribution-free predictive inference for regression. *Journal of*  
179 *the American Statistical Association* **113**, 1094–1111 (2018).

180 4. H Shimodaira, Improving predictive inference under covariate shift by weighting the log-likelihood function. *J. Stat. Plan.*  
181 *Inference* **90**, 227–244 (2000).

182 5. M Sugiyama, KR Müller, Input-dependent estimation of generalization error under covariate shift. *Stat. & Decis.* **23**,  
183 249–279 (2005).

184 6. M Sugiyama, M Krauledat, KR Müller, Covariate shift adaptation by importance weighted cross validation. *J. Mach.*  
185 *Learn. Res.* **8**, 985–1005 (2007).

186 7. AN Angelopoulos, S Bates, A gentle introduction to conformal prediction and distribution-free uncertainty quantification.  
187 arXiv preprint 2107.07511 (2021).

188 8. FJ Poelwijk, M Socolich, R Ranganathan, Learning the pattern of epistasis linking genotype and phenotype in a protein.  
189 *Nat. Commun.* **10**, 4213 (2019).

190 9. D Zhu, et al., Optimal trade-off control in machine learning-based library design, with application to adeno-associated  
191 virus (aav) for gene therapy. bioRxiv preprint 2021.11.02.467003 (2021).
